## The relationship of the underlying lipidic plaque at the implanted newer-generation drug-eluting stents with future stent-related events: insights from the REASSURE-NIRS registry

K. Murai<sup>1</sup>, Y. Kataoka<sup>1</sup>, T. Iwai<sup>1</sup>, K. Sawada<sup>1</sup>, H. Matama<sup>1</sup>, S. Honda<sup>1</sup>, M. Fujino<sup>1</sup>, S. Yoneda<sup>1</sup>, K. Takagi<sup>1</sup>, K. Nishihira<sup>2</sup>, T. Kanaya<sup>3</sup>, F. Otsuka<sup>1</sup>, Y. Asaumi<sup>1</sup>, K. Tsujita<sup>4</sup>, T. Noguchi<sup>1</sup>

<sup>1</sup>National Cerebral & Cardiovascular Center, Suita, Japan; <sup>2</sup>Miyazaki Medical Association Hospital, Department of Cardiology, Miyazaki, Japan; <sup>3</sup>Dokkyo Medical University, Department of Cardiovascular Medicine, Mibu, Japan; <sup>4</sup>Kumamoto University, Department of Cardiovascular Medicine, Kumamoto, Japan

On behalf of the REASSURE-NIRS registry

**Funding Acknowledgement:** Type of funding sources: None.

**Background:** Lipid-rich plaque is an important substrate causing acute coronary events. Near-infrared spectroscopy (NIRS) imaging has been shown to visualize lipidic coronary plaque at non-culprit site associated with future coronary events. Given that histopathological studies reported that the unstable plaque underlying the implanted drug-eluting stent (DES) could cause neoatherosclerosis formation, we hypothesized that NIRS-based evaluation of lipidic plaque burden behind the implanted DES may clinically predict the occurrence of stent failure in patients with CAD receiving PCI.

**Purpose:** We aimed to investigate the relationship of stent-related events' risk with lipidic plaque materials behind the implanted DES imaged by NIRS/intravascular ultrasound (NIRS/IVUS) imaging.

**Methods:** The REASSURE-NIRS registry is an on-going multi-center registry to enroll CAD subjects receiving NIRS/IVUS-guided PCI. In this registry data, 406 lesions in 379 CAD subjects (ACS/non-ACS=150/229) receiving new-generation DES were analyzed. Minimum stent area (MSA) after PCI and maximum lipid-core-burden index in any 4mm-segment within the implanted stents (in-stent maxLCBI4mm) were measured. A 3-year lesion-oriented composite outcome [LOCO: culprit lesion-related MI + ischemia-driven target lesion revascularization (ID-TLR)] was compared in subjects stratified according to the tertile of in-stent maxLCBI4mm.

**Results:** The mean value of in-stent maxLCBI4mm was 221, and 17% of lesions exhibited in-stent maxLCBI4mm >400. Patients with a greater in-stent maxLCBI4mm were more likely to exhibit a higher LDL-C level ( $p=0.026$ ) with a longer stent length ( $p<0.001$ ) and a smaller MSA ( $p=0.033$ ) (Picture 1). Over 95% of entire study subjects received a statin. During the observational period (median=726 days), the frequency of LOCO up to 3 years was 3.4% in entire study subjects (culprit lesion-related MI=1.0%, ID-TLR=2.8%). Kaplan-Meier curve analysis demonstrated that the occurrence of LOCO did not increase in association with in-stent maxLCBI4mm (log-rank  $p$ -value=0.25, Picture 2). In addition, in-stent maxLCBI4mm did not associate with each component of LOCO (culprit lesion-related MI:  $p=0.502$ , ID-TLR:  $p=0.872$ ). Receiver Operating Characteristic analysis revealed that the predictive ability of in-stent maxLCBI4mm for the occurrence of LOCO was unsatisfactorily (c-statistics=0.486).

**Conclusion:** The amount of underlying lipidic materials at culprit lesions receiving new-generation DES implantation did not necessarily predict future stent-related events. Clinical significance of maxLCBI4mm behind the implanted DES may be different from that at naïve non-culprit plaques.

|                                                    | in-stent maxLCBI4mm    |                             |                           | p value |
|----------------------------------------------------|------------------------|-----------------------------|---------------------------|---------|
|                                                    | Low tertile<br>(0-124) | Middle tertile<br>(126-272) | High tertile<br>(276-799) |         |
| <b>Background characteristics</b>                  |                        |                             |                           |         |
| Age, years                                         | 70 ± 10                | 68 ± 11                     | 69 ± 11                   | 0.415   |
| Male                                               | 79%                    | 81%                         | 80%                       | 0.940   |
| ACS                                                | 36%                    | 37%                         | 45%                       | 0.309   |
| Statin use at discharge                            | 95%                    | 95%                         | 97%                       | 0.579   |
| <b>Laboratory data at administration</b>           |                        |                             |                           |         |
| LDL-C, mg/dL                                       | 94 ± 35                | 95 ± 37                     | 105 ± 35                  | 0.026   |
| HbA1c, %                                           | 6.2 ± 0.7              | 6.3 ± 0.9                   | 6.3 ± 0.9                 | 0.622   |
| <b>Angiographical findings after PCI</b>           |                        |                             |                           |         |
| LAD                                                | 52%                    | 64%                         | 62%                       | 0.100   |
| Total stent length, mm                             | 25.6 ± 11.1            | 30.9 ± 14.4                 | 32.7 ± 15.8               | <0.001  |
| Percent diameter stenosis, %                       | 7 (2-12)               | 7 (3-14)                    | 7 (1-14)                  | 0.815   |
| <b>Intravascular ultrasound findings after PCI</b> |                        |                             |                           |         |
| Minimum stent area, mm <sup>2</sup>                | 6.34 ± 2.26            | 5.80 ± 2.18                 | 5.69 ± 2.07               | 0.033   |

LAD; left anterior-descending artery, LCBI; lipid-core burden index, PCI; percutaneous coronary intervention

Background and lesion characteristics

**LOCO; Lesion-oriented clinical outcomes**  
=culprit lesion-related MI + ischemia-driven target lesion revascularization

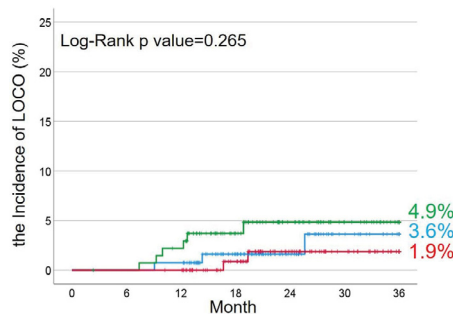

in-stent maxLCBI4mm  
Low (0-124) Middle (126-272) High (276-799)

LCBI; lipid-core burden index

Kaplan-Meier analysis for LOCO
